# Supplementary material
Source: PubMed Central journal article supplement (PMC3957402)

Strongly disagree **1 2 3 4 5** Strongly agree

v1 "Expand/Contract" Interface  
v2 "At-a-glance" Interface

1) I think that I would like to use this system frequently

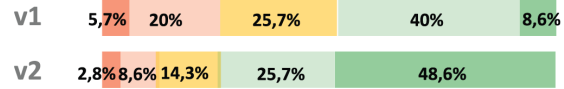

2) I found the system unnecessarily complex

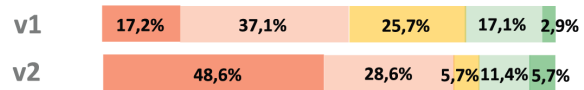

3) I thought the system was easy to use

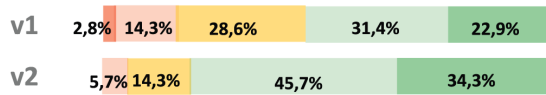

4) I think that I would need the support of a technical person to be able to use this system

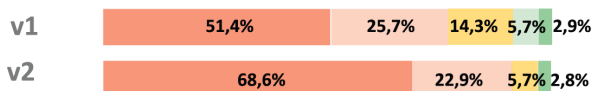

5) I found the various functions in this system were well integrated

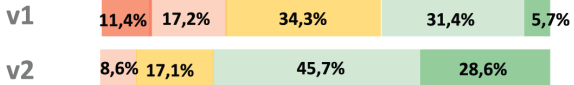

6) I thought there was too much inconsistency in this system

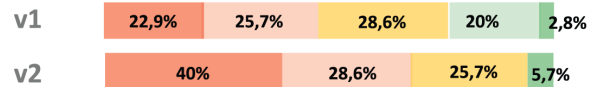

7) I would imagine that most people would learn to use this system very quickly

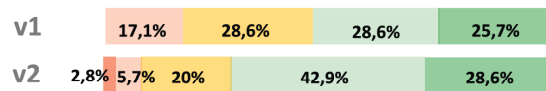

8) I found the system very cumbersome to use

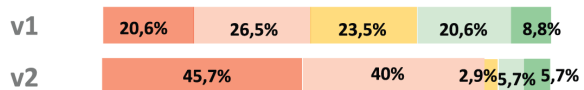

9) I felt very confident using the system

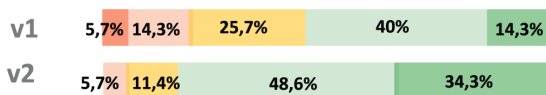

10) I needed to learn a lot of things before I could get going with the system

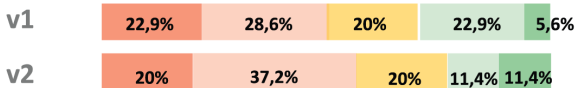

Supplement: amiajnl-2013-002042-s1.pdf [file amiajnl-2013-002042-s1.pdf]
